# Supplementary material
Source: PubMed Central journal article supplement (PMC3317885)
Supplement: halms568171-supplement_1.pdf [file halms568171-supplement_1.pdf]

## Supplementary data I

A library of 120 local structure prototypes (LSPs) of 11-residue long and encompassing all known local protein structures, was previously developed (Benros, et al., 2006). Figure S1 shows some examples of LSPs.

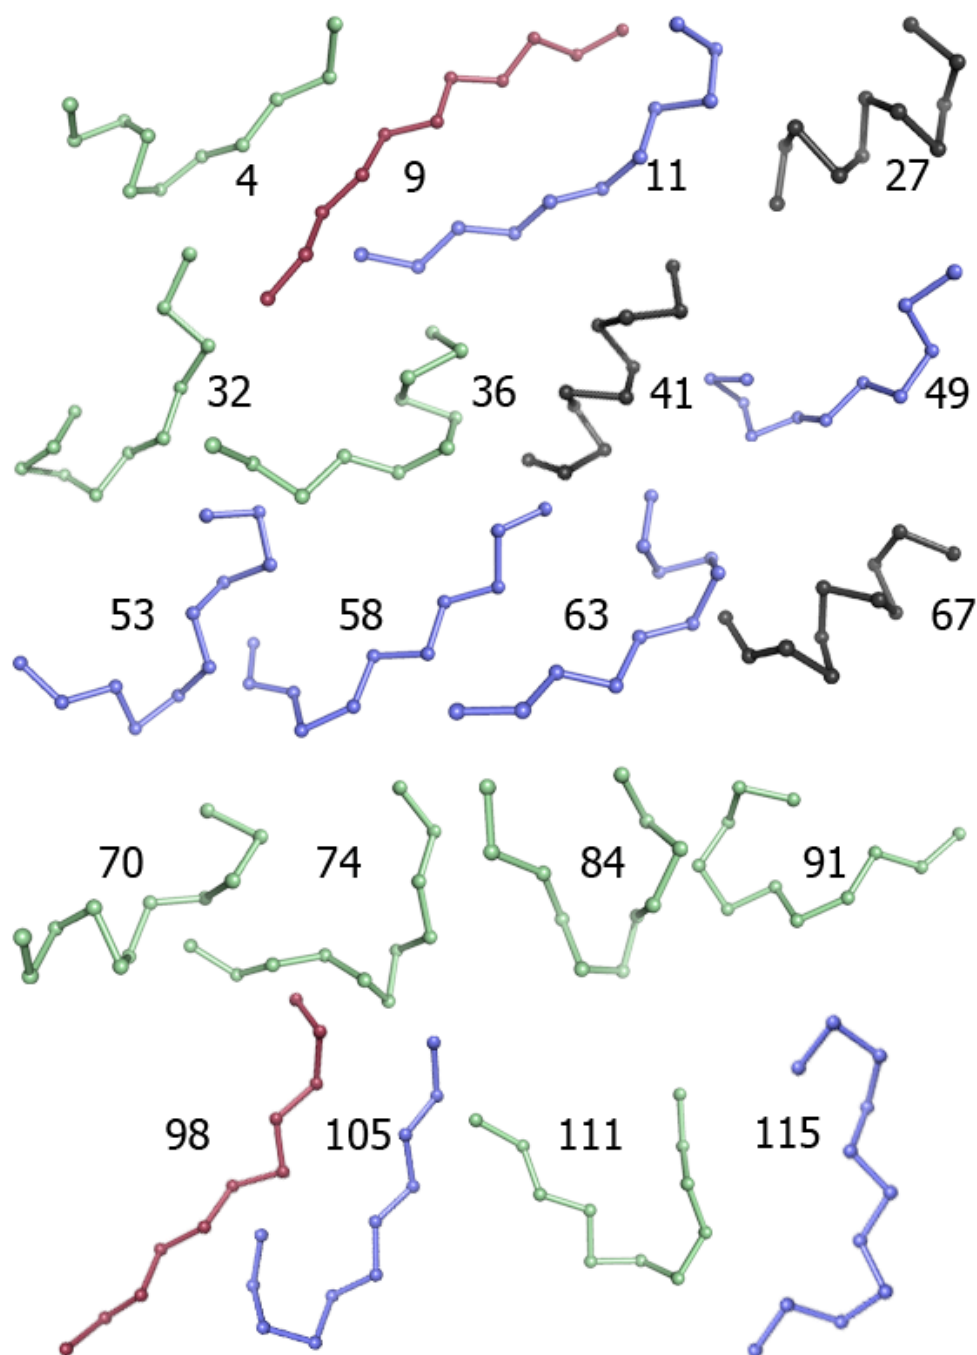

Figure 1 – Examples of Local Structure Prototypes (LSPs).

### References

Benros, C., de Brevern, A.G., Etchebest, C. and Hazout, S. (2006) Assessing a novel approach for predicting local 3D protein structures from sequence, *Proteins*, **62**, 865-880.
